# Supplementary material for: Linking rare and common disease: mapping clinical disease-phenotypes to ontologies in therapeutic target validation
Source: Springer Nature journal article supplement (doi:10.1186/s13326-016-0051-7), 2016-02-29
Supplement: 13326_2016_51_MOESM1_ESM.pdf [file 13326_2016_51_MOESM1_ESM.pdf]

Text mining results are available as followed:

IBD:

<http://sourceforge.net/p/efo/code/HEAD/tree/trunk/src/efoassociations/ibd.tar.gz>

Autoimmunity:

<http://sourceforge.net/p/efo/code/HEAD/tree/trunk/src/efoassociations/immune.tar>

Skeletal disorders:

<http://sourceforge.net/p/efo/code/HEAD/tree/trunk/src/efoassociations/skeletal.tar>

Metabolism disorders:

<http://sourceforge.net/p/efo/code/HEAD/tree/trunk/src/efoassociations/metabolism.tar>
