# Supplementary material for: Linking rare and common disease: mapping clinical disease-phenotypes to ontologies in therapeutic target validation
Source: Springer Nature journal article supplement (doi:10.1186/s13326-016-0051-7), 2016-02-29
Supplement: 13326_2016_51_MOESM2_ESM.pdf [file 13326_2016_51_MOESM2_ESM.pdf]

Journals Mined for IBD associations

|           |                                                                                                |
|-----------|------------------------------------------------------------------------------------------------|
| 0193-1857 | American Journal of Physiology – Gastrointestinal and Liver Physiology                         |
| 1108-7471 | Annals of Gastroenterology : Quarterly Publication of the Hellenic Society of Gastroenterology |
| 1471-230X | BMC Gastroenterology                                                                           |
| 1662-0631 | Case Reports in Gastroenterology                                                               |
| 1178-7023 | Clinical and Experimental Gastroenterology                                                     |
| 1179-5522 | Clinical Medicine Insights. Gastroenterology                                                   |
| 1554-7914 | Gastroenterology & Hepatology                                                                  |
| 1687-6121 | Gastroenterology Research and Practice                                                         |
| 2052-0034 | Gastroenterology Report                                                                        |
| 0017-5749 | Gut                                                                                            |
| 2090-8040 | International Journal of Inflammation                                                          |
| 2090-4398 | ISRN Gastroenterology                                                                          |
| 2090-8695 | ISRN inflammation                                                                              |
| 1476-9255 | Journal of Inflammation (London, England)                                                      |
| 1178-7031 | Journal of Inflammation Research                                                               |
| 2154-1280 | Journal of Interventional Gastroenterology                                                     |
| 1756-283X | Therapeutic Advances in Gastroenterology                                                       |
| 1007-9327 | World Journal of Gastroenterology : WJG                                                        |
| 1948-5190 | World Journal of Gastrointestinal Endoscopy                                                    |
| 2150-5330 | World Journal of Gastrointestinal Pathophysiology                                              |
| 1948-9366 | World Journal of Gastrointestinal Surgery                                                      |
