# Supplementary material for: Linking rare and common disease: mapping clinical disease-phenotypes to ontologies in therapeutic target validation
Source: Springer Nature journal article supplement (doi:10.1186/s13326-016-0051-7), 2016-02-29

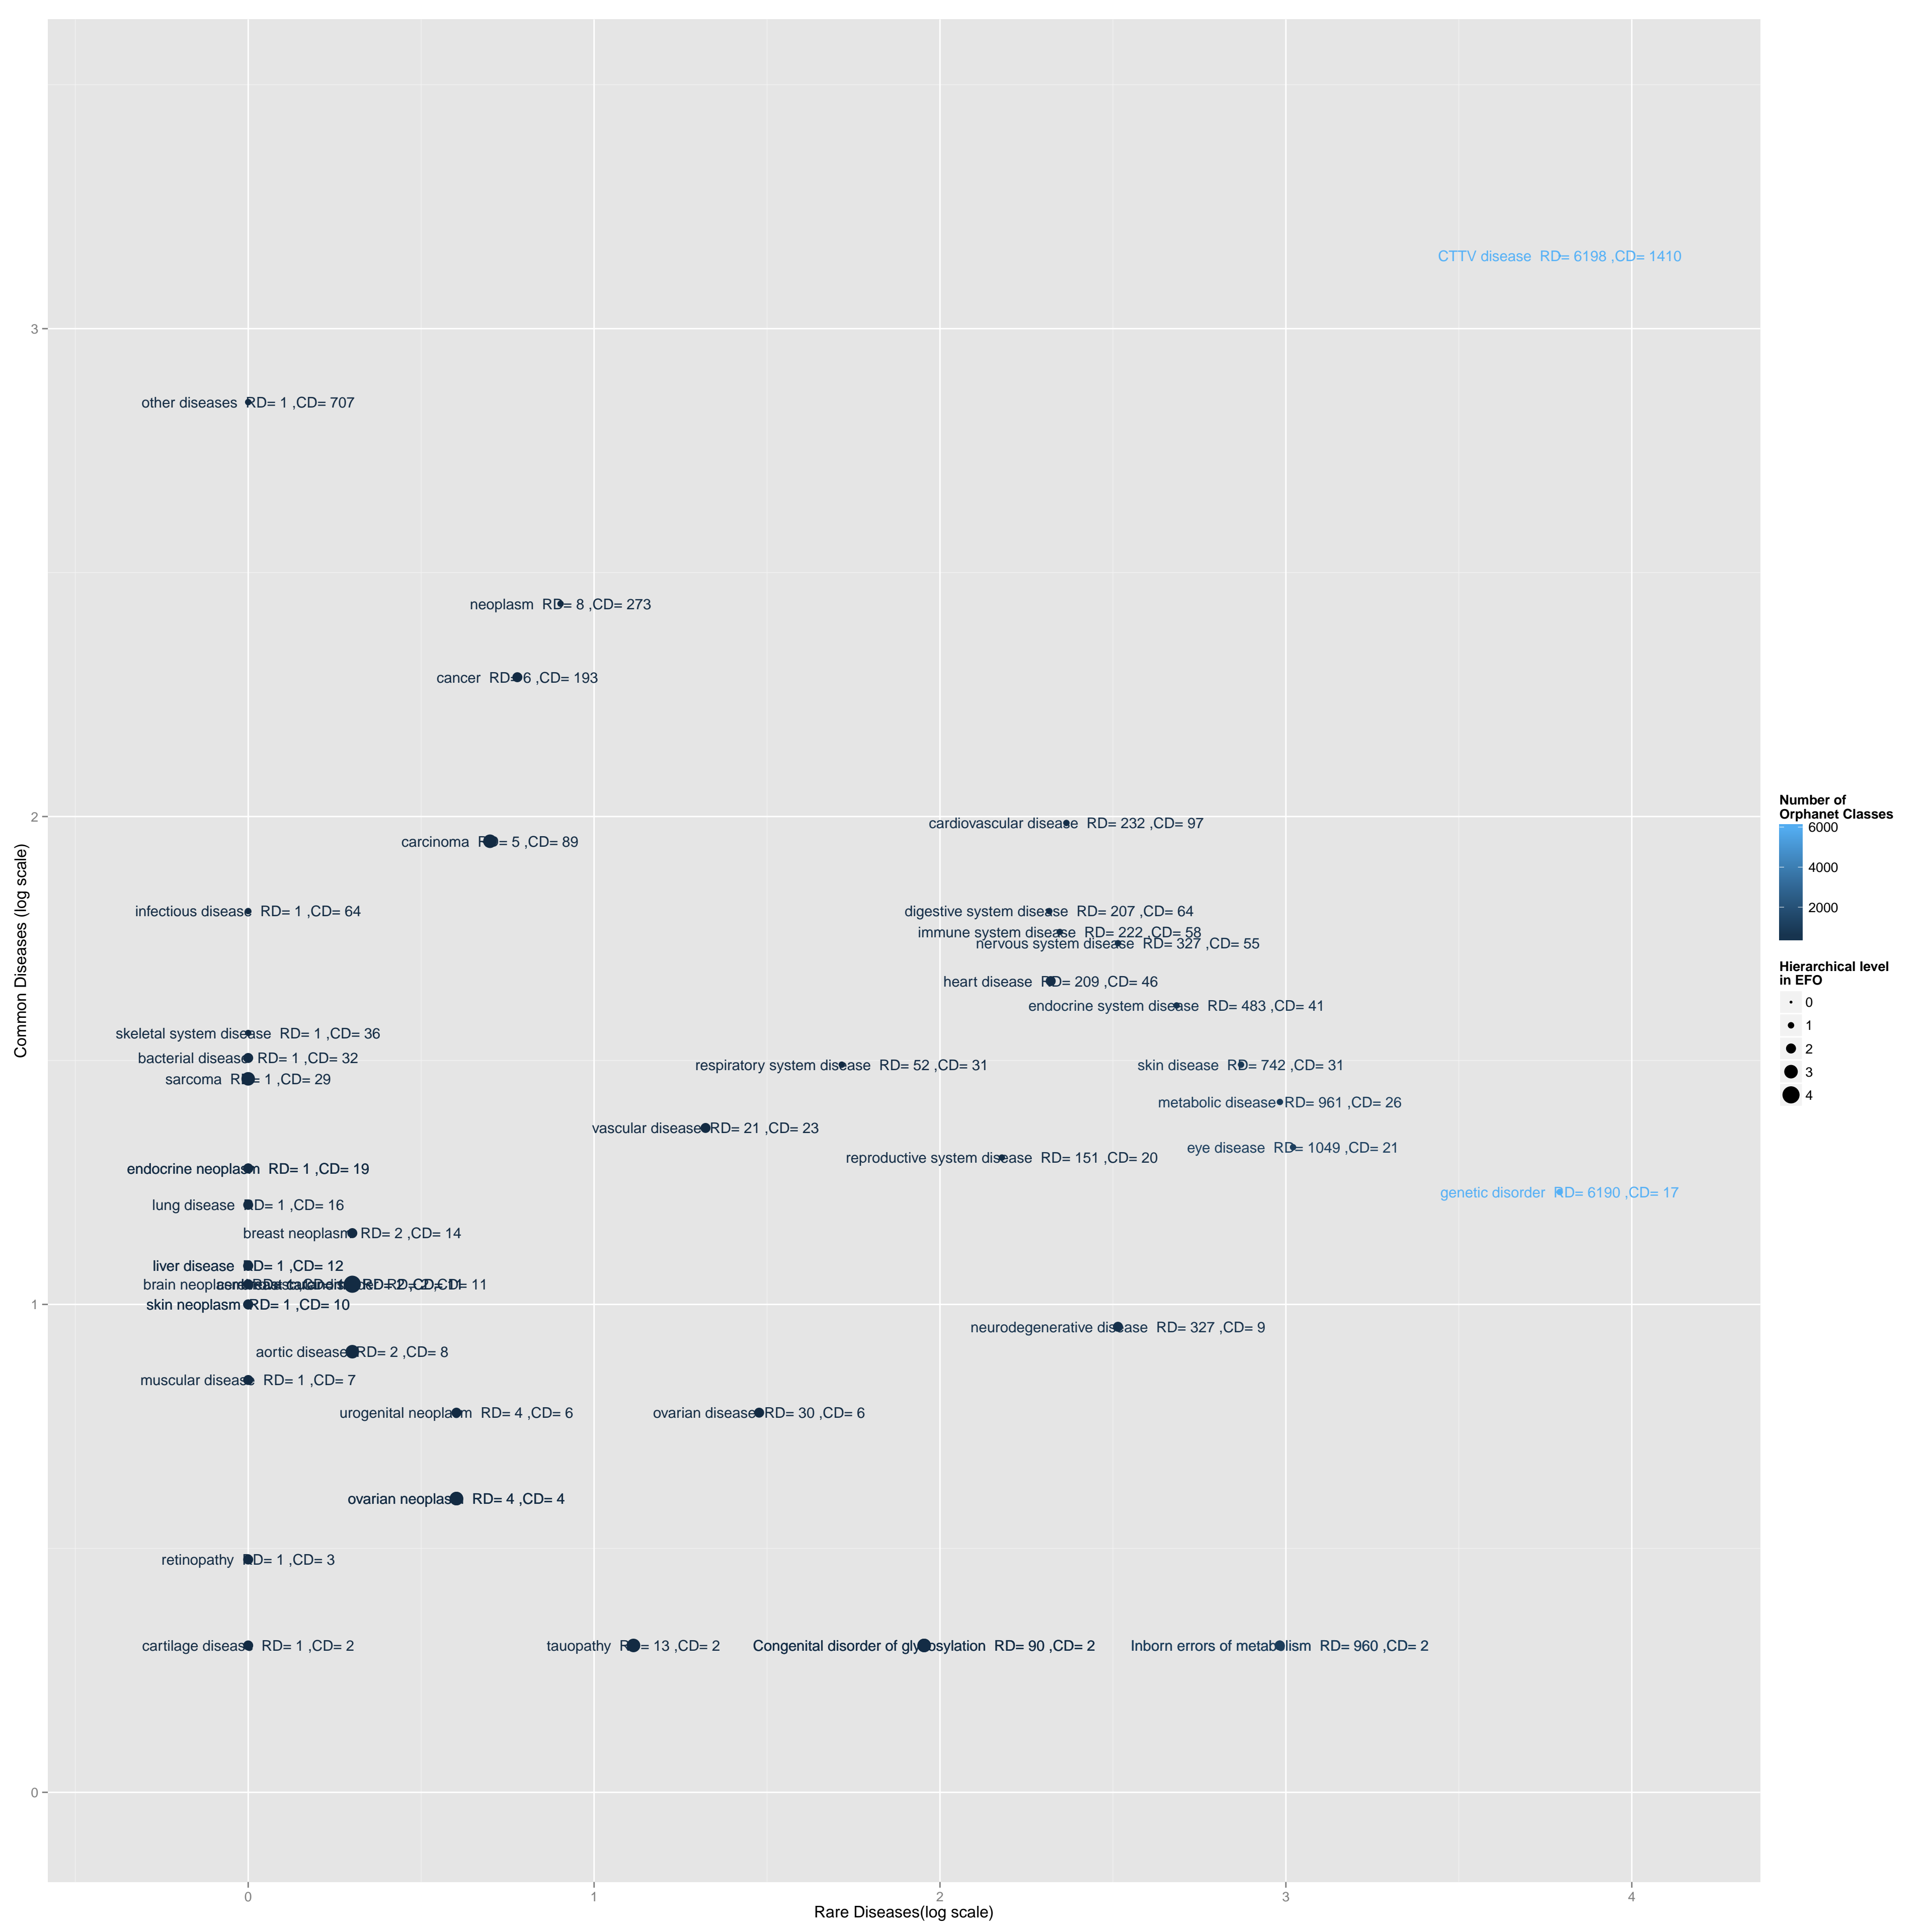

Supplement: MOESM3 [file 13326_2016_51_MOESM3_ESM.pdf]
